# Supplementary material
Source: PubMed Central journal article supplement (PMC7469640)
Supplement: KAUP_A_1686728_SM5422.pdf [file KAUP_A_1686728_SM5422.pdf]

## **Supplemental material**

### **Lysosomotropic beta blockers induce oxidative stress and IL23A production in Langerhans cells**

Gerrit Müller<sup>a</sup>, Charlotte Lübow<sup>a,b</sup>, and Günther Weindl<sup>a,b</sup>

<sup>a</sup>Freie Universität Berlin, Institute of Pharmacy (Pharmacology and Toxicology),  
Berlin, Germany; <sup>b</sup>University of Bonn, Pharmaceutical Institute, Section  
Pharmacology and Toxicology, Bonn, Germany

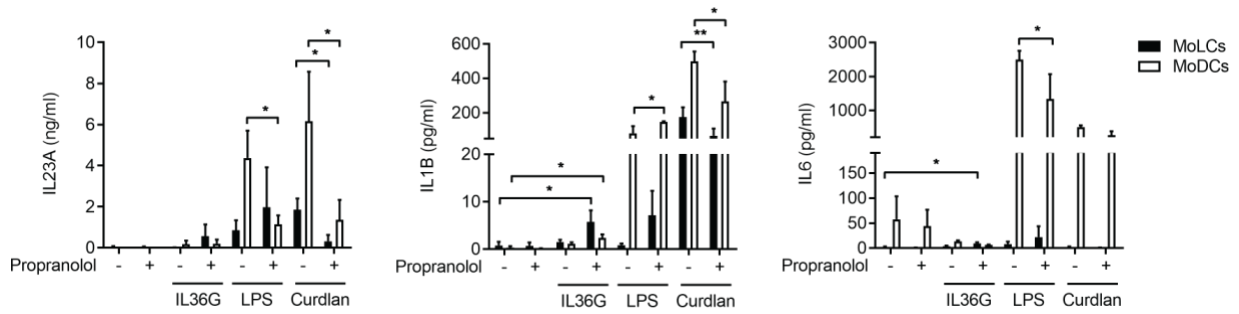

**Figure S1.** Propranolol differentially modulates production of psoriasis-like inflammation associated cytokines by IL36G-, LPS- and curdlan-stimulated MoLCs and MoDCs. Cells were activated for 24 h with rh-IL36G (100 ng/ml), LPS (1  $\mu$ g/ml) or curdlan (20  $\mu$ g/ml), respectively, with or without propranolol (75  $\mu$ M). IL23A, IL1B and IL6 levels were analyzed by ELISA. \* $P$  < 0.05, \*\* $P$  < 0.01, one-way ANOVA test followed by Bonferroni post-test. Data are representative of 3 independent experiments and display mean values + SEM.

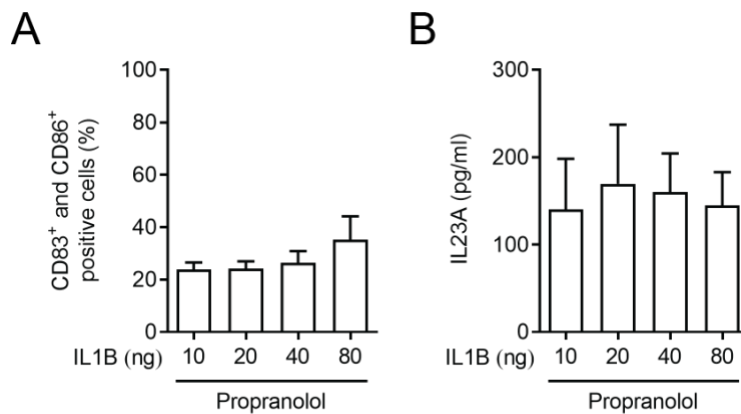

**Figure S2.** Increasing IL1B concentrations maintain propranolol-induced IL23A response in MoDCs. (A) Expression of CD83 and CD86 in MoDCs and (B) IL23A release after activation with different IL1B concentrations (10 - 80 ng/ml) in the presence of propranolol (75  $\mu$ M) for 24 h. Data represent mean values + SEM (n=3).

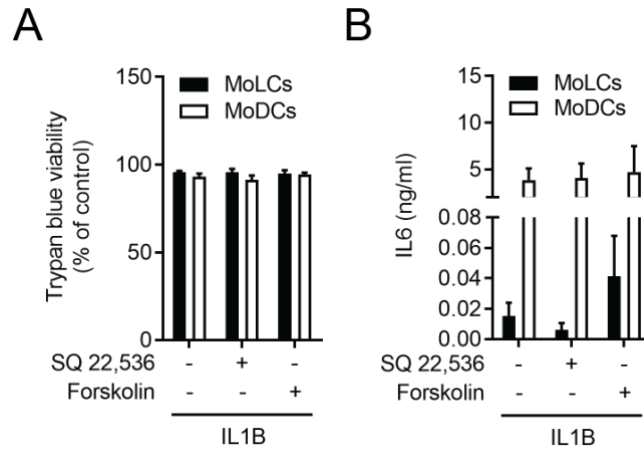

**Figure S3.** IL6 production by MoLCs is regulated by cAMP modulators. (A) Cell viability of MoLCs and MoDCs was evaluated using trypan blue exclusion assay after 24 h following stimulation with SQ 22,536 (100  $\mu$ M) or forskolin (20  $\mu$ M) in the presence of IL1B (20 ng/ml). Data represent mean values + SEM (n=3-6). (B) IL6 release into supernatants from IL1B-activated MoLCs and MoDCs was determined after 24 h of stimulation with SQ 22,536 (100  $\mu$ M) or forskolin (20  $\mu$ M). Data represent mean values + SEM (n=4).

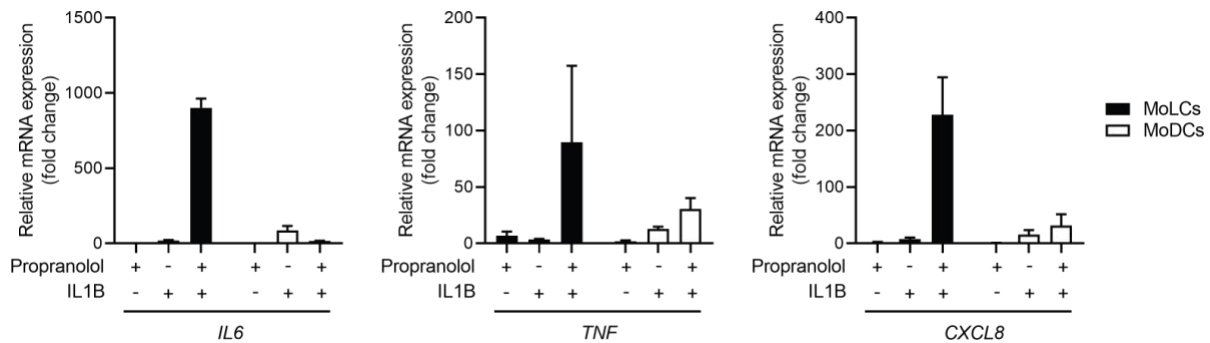

**Figure S4.** Propranolol increases gene expression of psoriasis-like inflammation associated mediators under sterile-inflammatory conditions. Quantification of *IL6*, *TNF* and *CXCL8* mRNA expression in immature and IL1B-activated (20 ng/ml) DC subsets stimulated for 3 h (TNF) or 24 h (IL6, CXCL8) with or without propranolol (75  $\mu$ M). Gene transcripts were normalized to *GAPDH* and presented relative to unstimulated controls (set as 1.0). Data represent mean values + SEM (n=3).

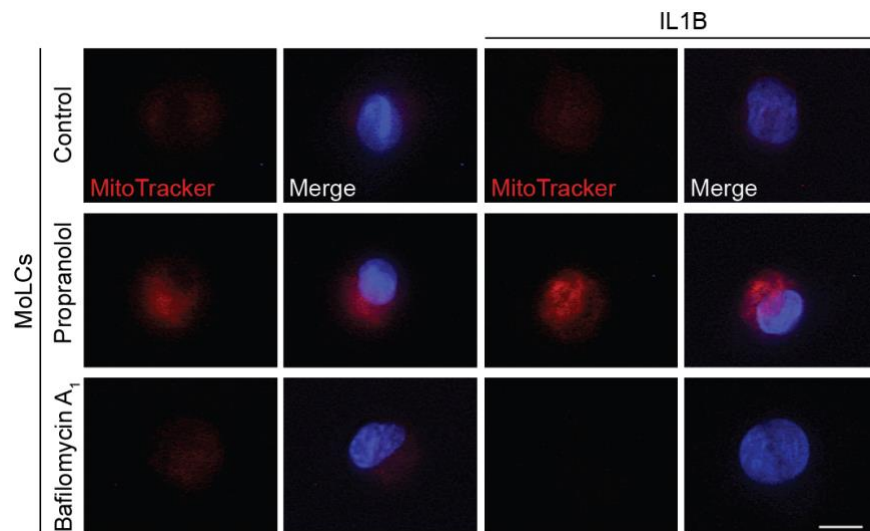

**Figure S5.** Propranolol increases ROS-producing mitochondria in MoLCs. MoLCs were pre-incubated with MitoSOX for 10 min and subsequently cultivated for 24 h in the presence or absence of IL1B, propranolol (75  $\mu$ M) or bafilomycin A<sub>1</sub> (1  $\mu$ M). Detection of mitochondrial-generated ROS was examined by fluorescence microscopy. Data are representative of 4 independent experiments. Scale bar: 10  $\mu$ m.

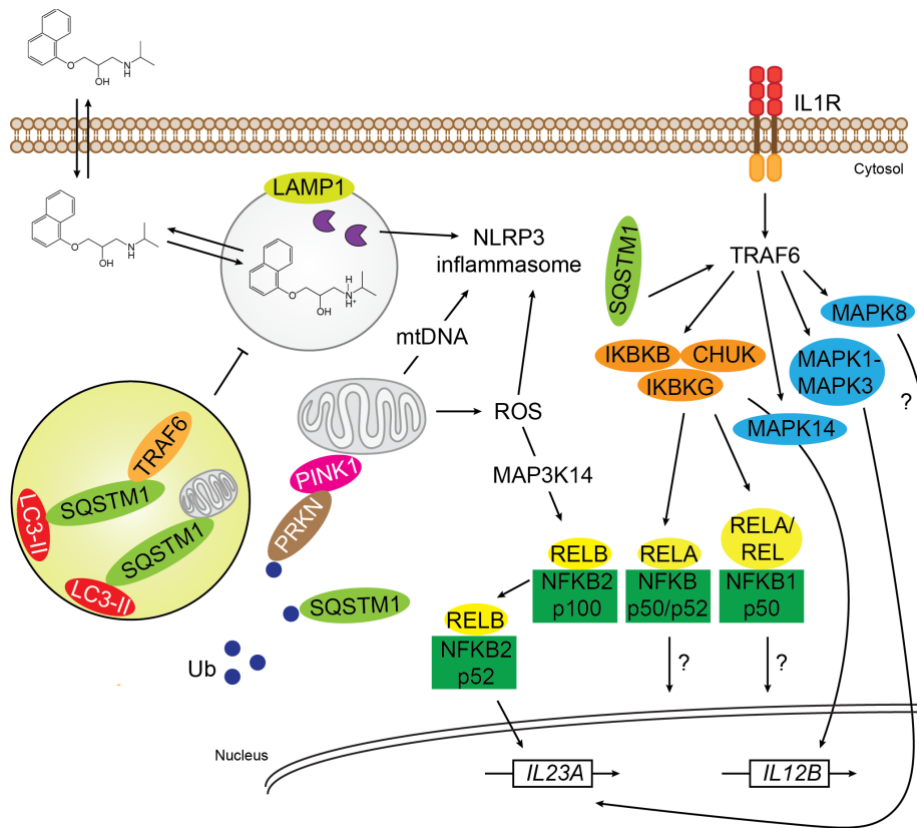

**Figure S6.** Proposed immunoregulatory mechanism in cutaneous dendritic cells induced by lysosomotropic beta-blockers and possibly other lysosomotropic drugs.
